# Supplementary material
Source: PubMed Central journal article supplement (PMC2761970)

Spectral data for:

**Crossed Intermolecular [2+2] Cycloadditions of Acyclic Enones via Visible Light Photocatalysis**

Juana Du and Tehshik P. Yoon\*

*Department of Chemistry, University of Wisconsin–Madison, 1101 University Avenue, Madison, Wisconsin 53706–1396*



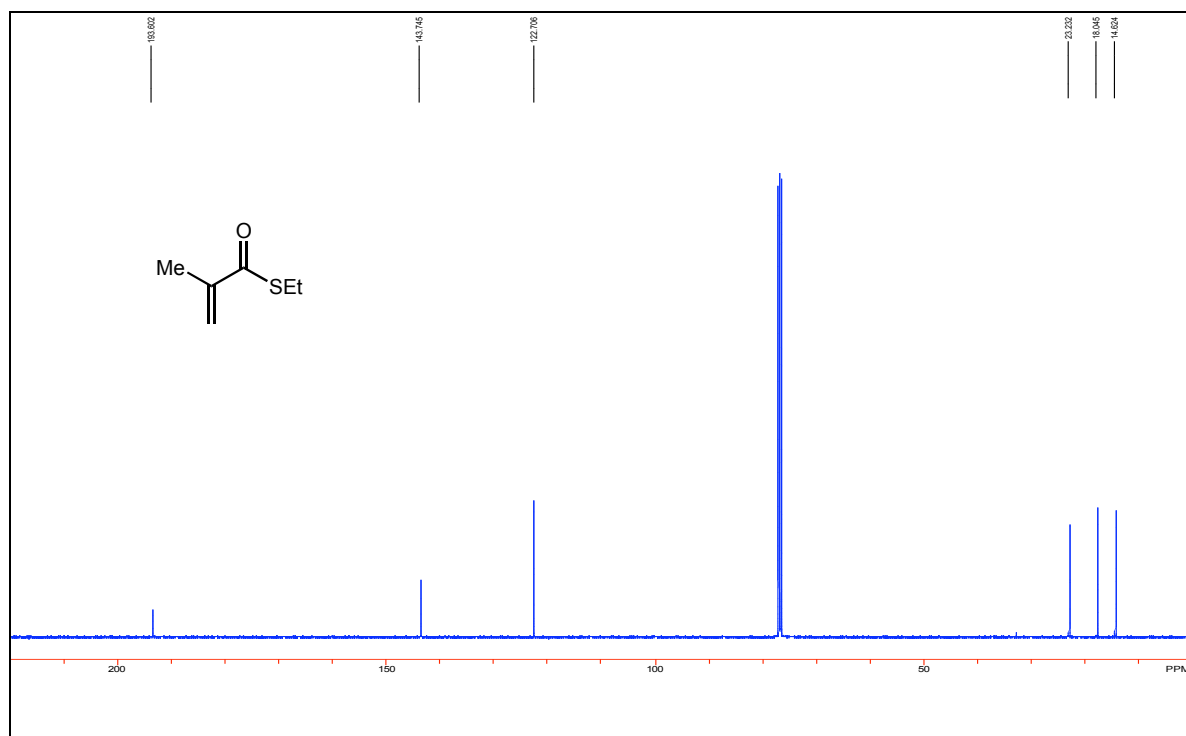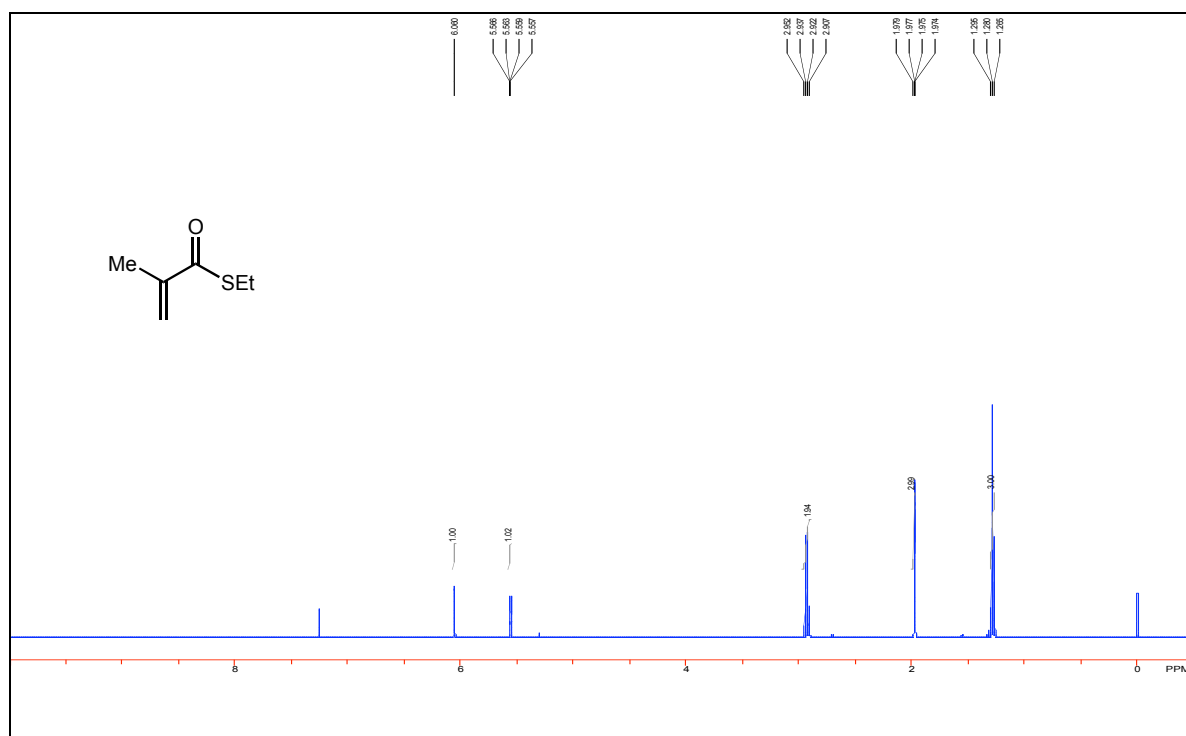

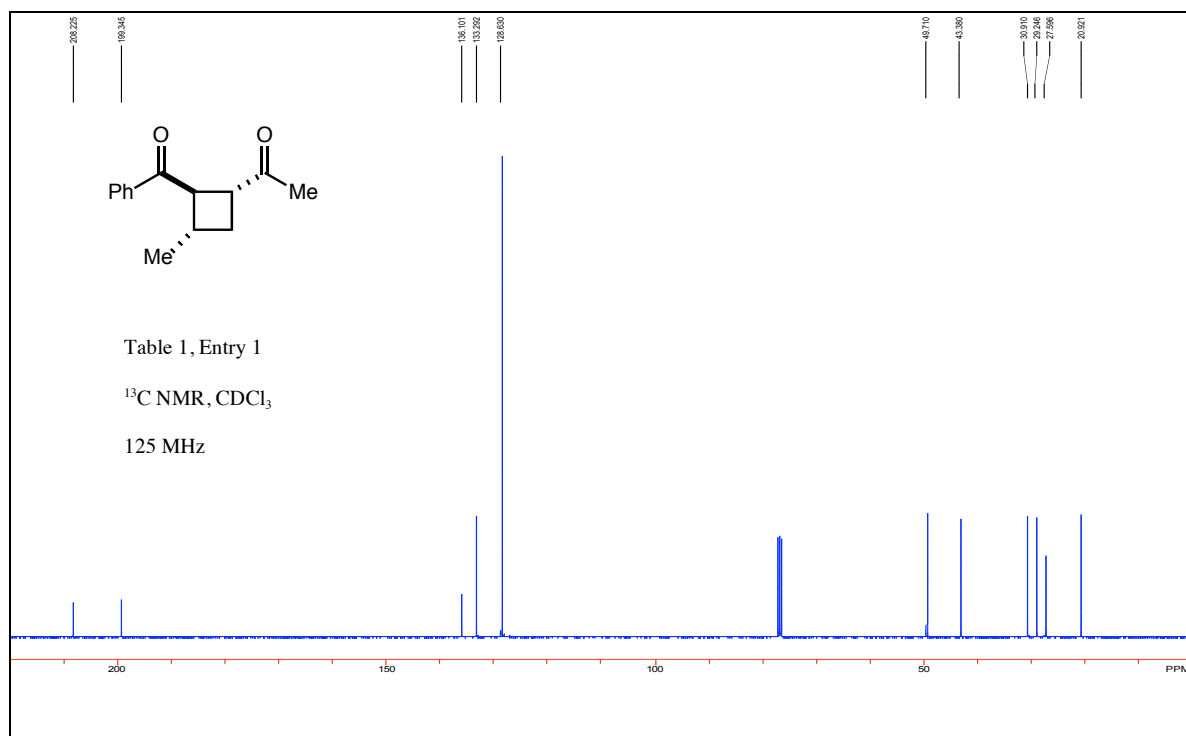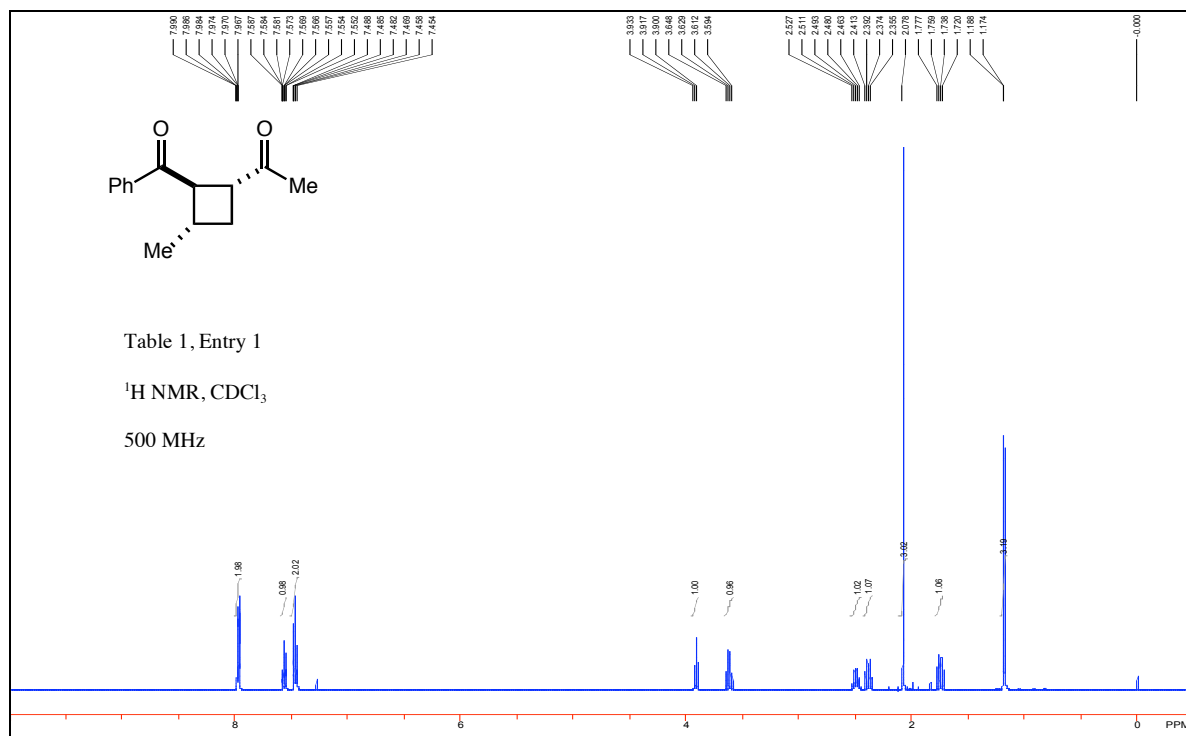

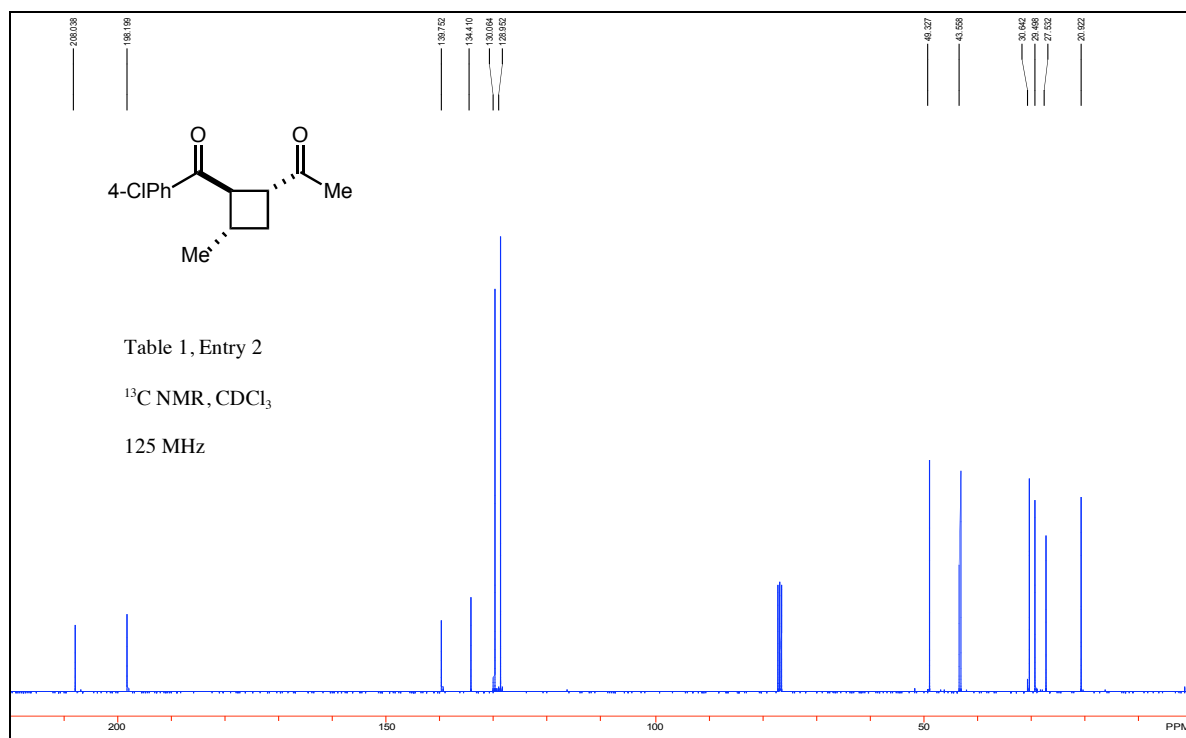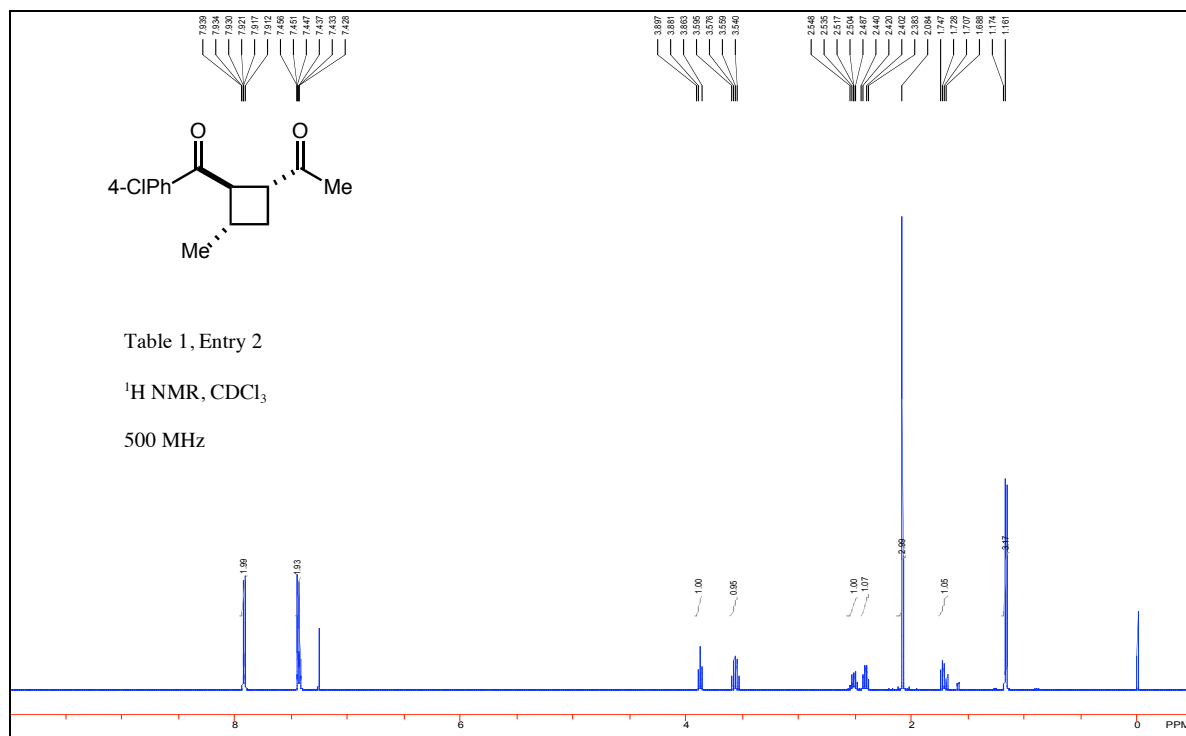

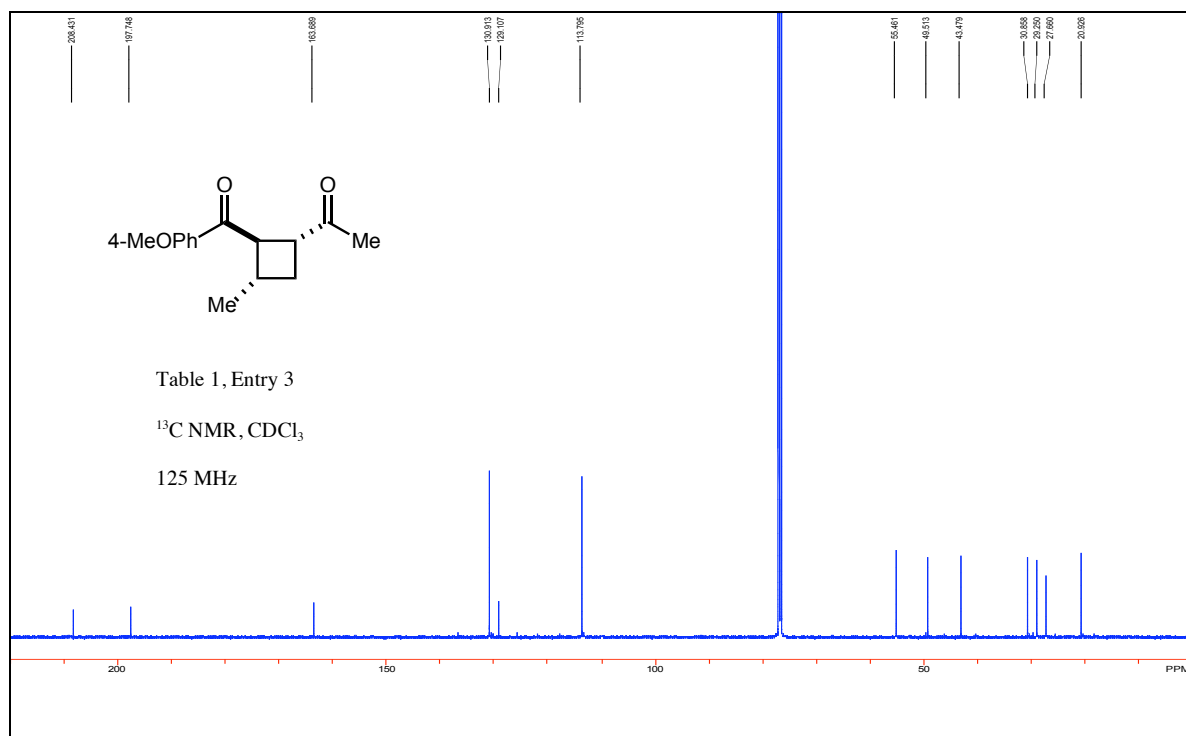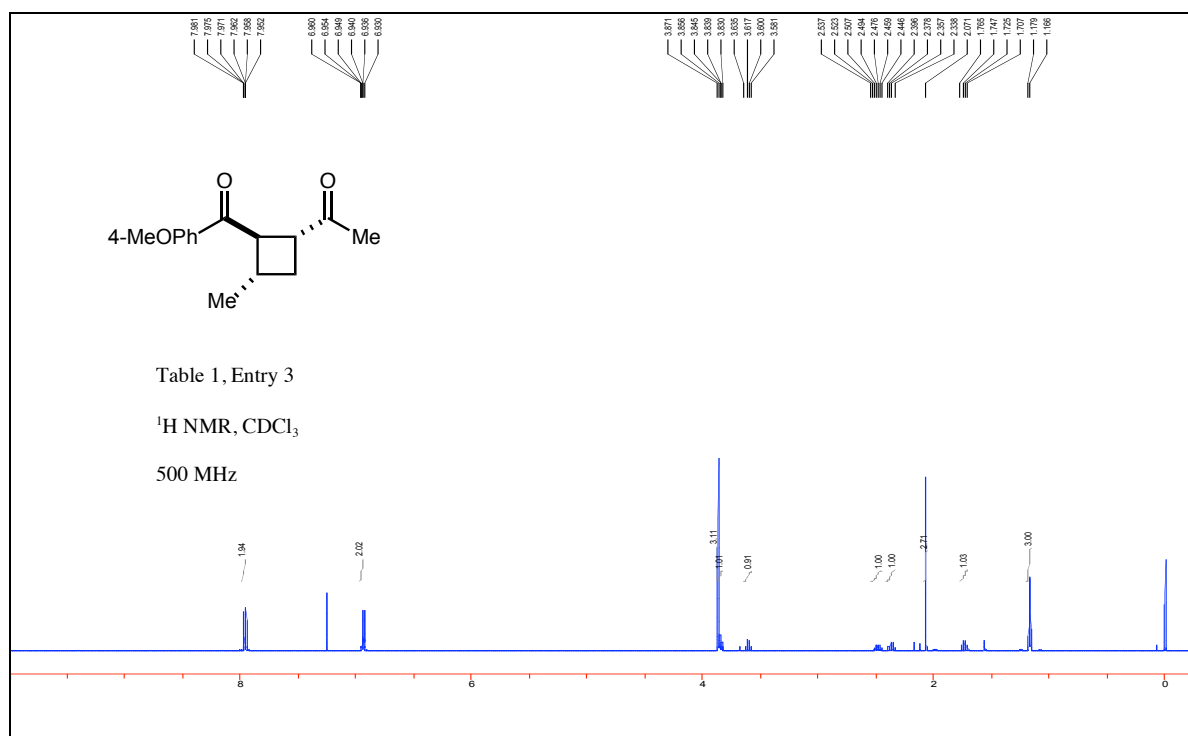

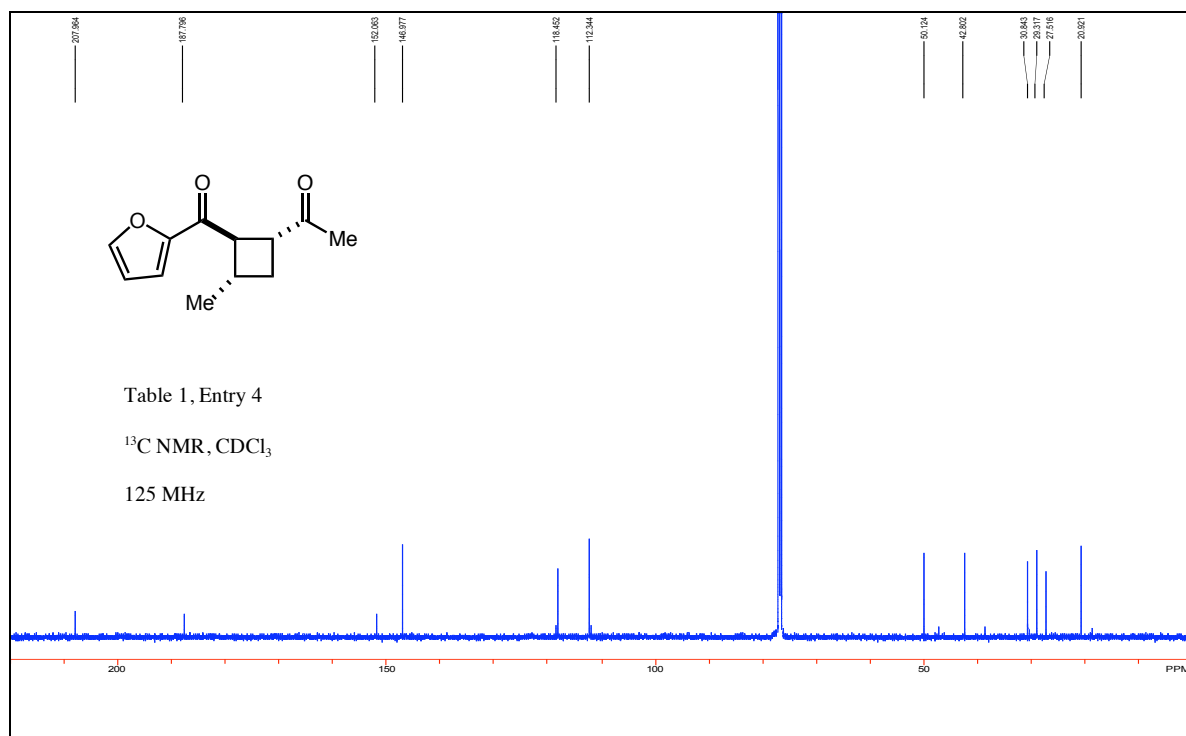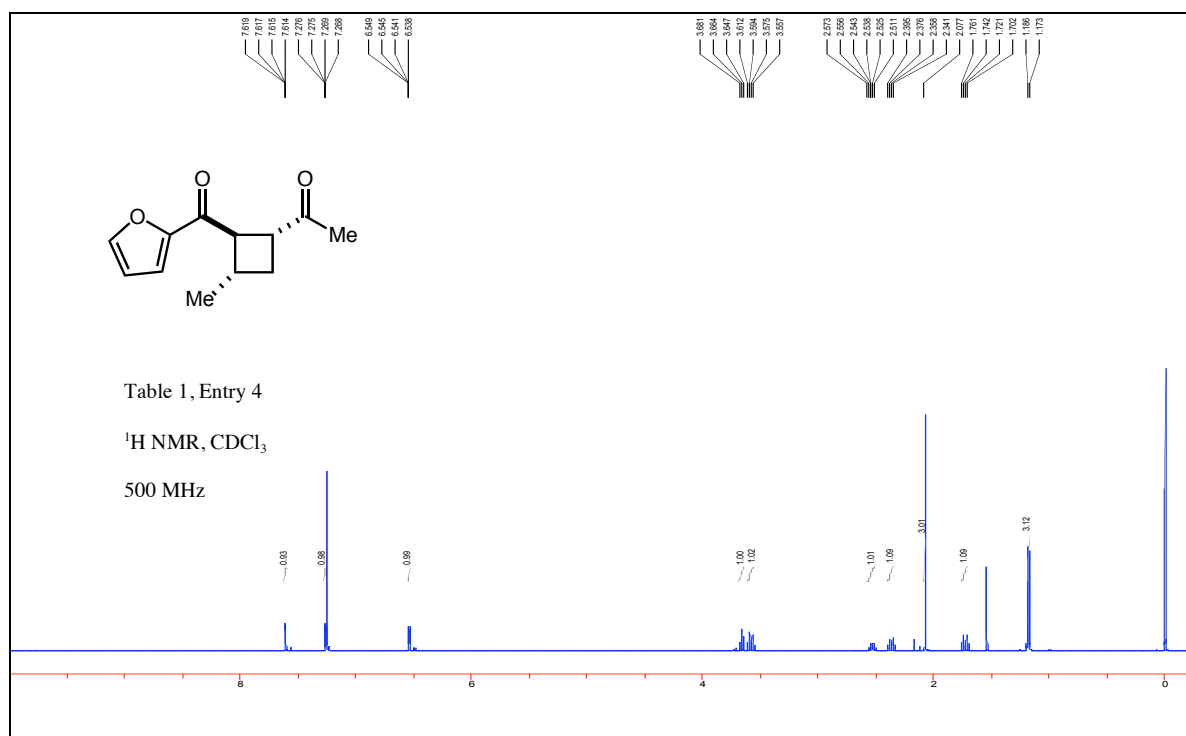

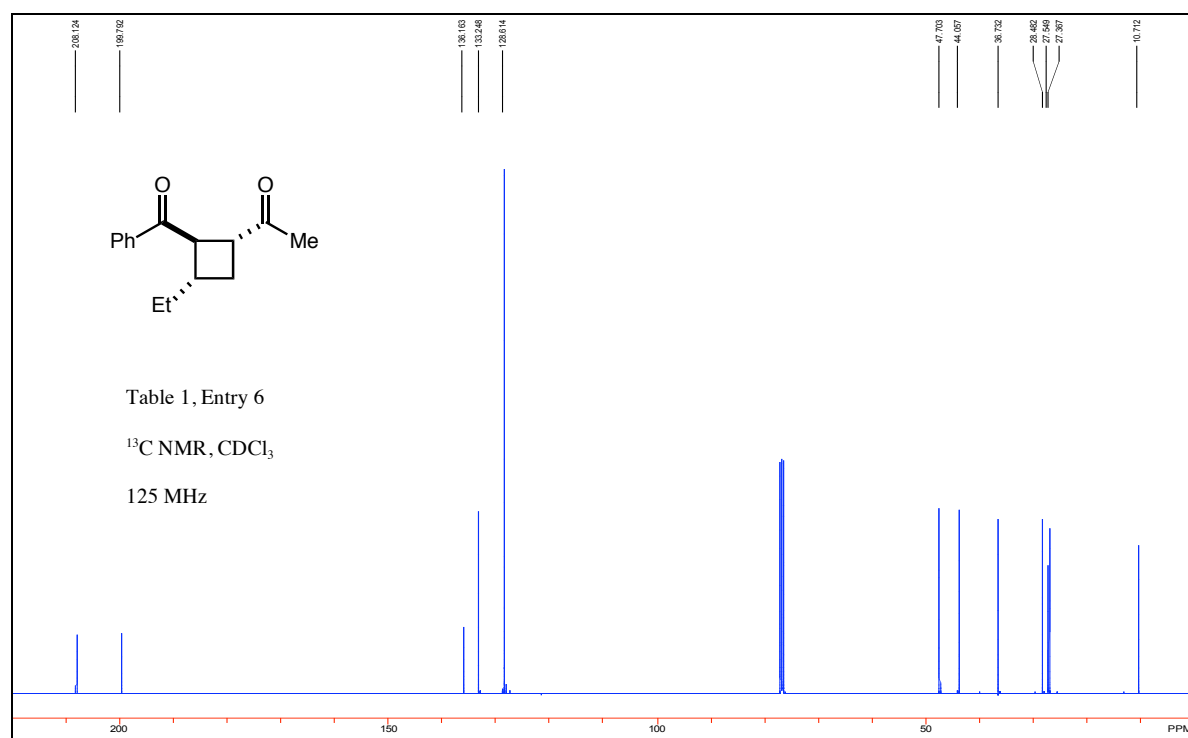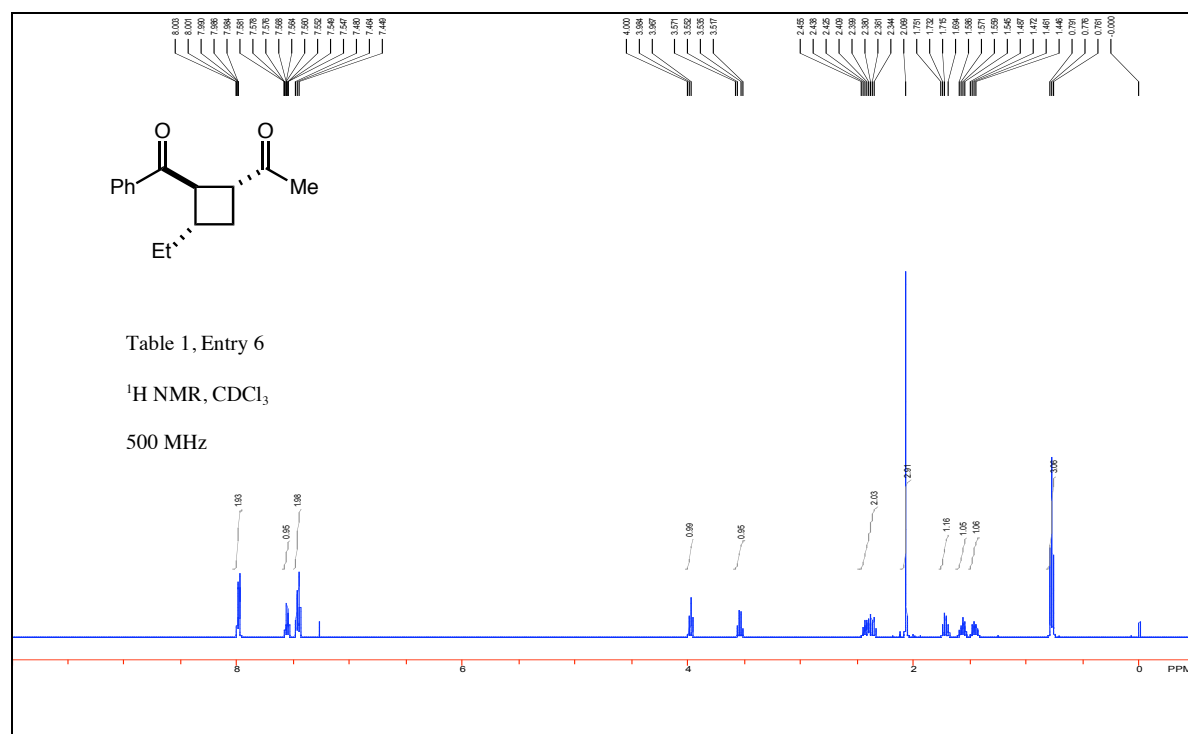



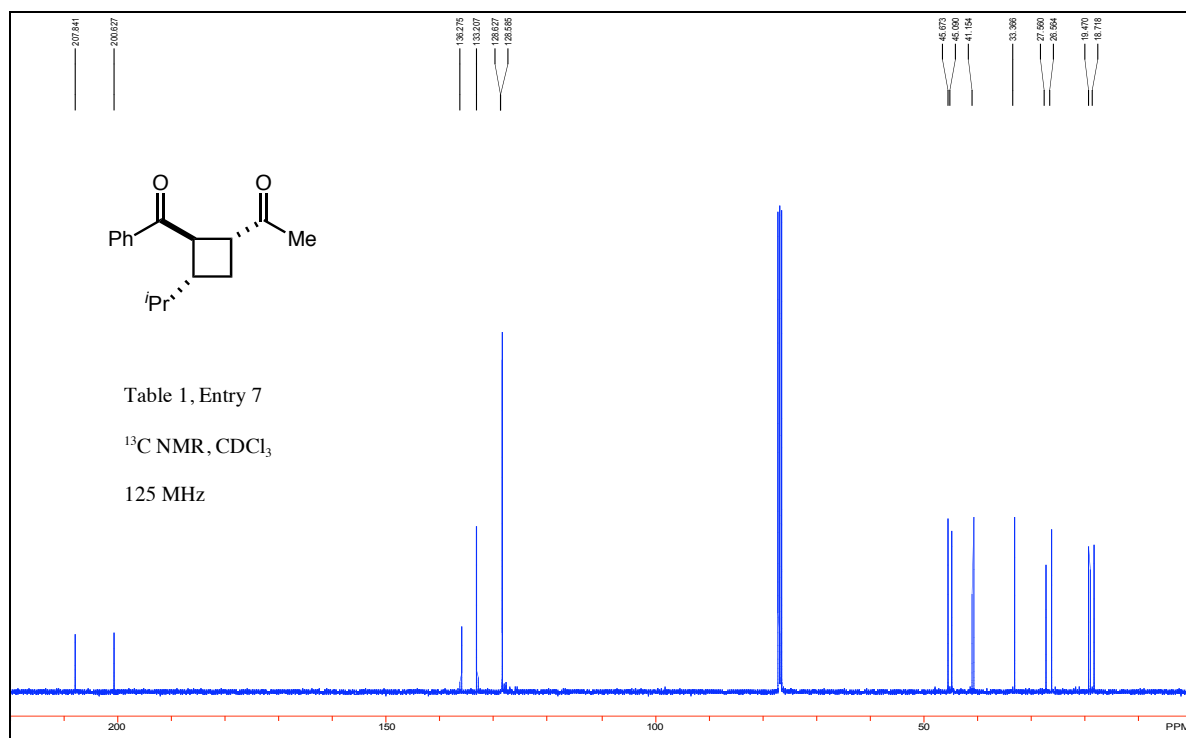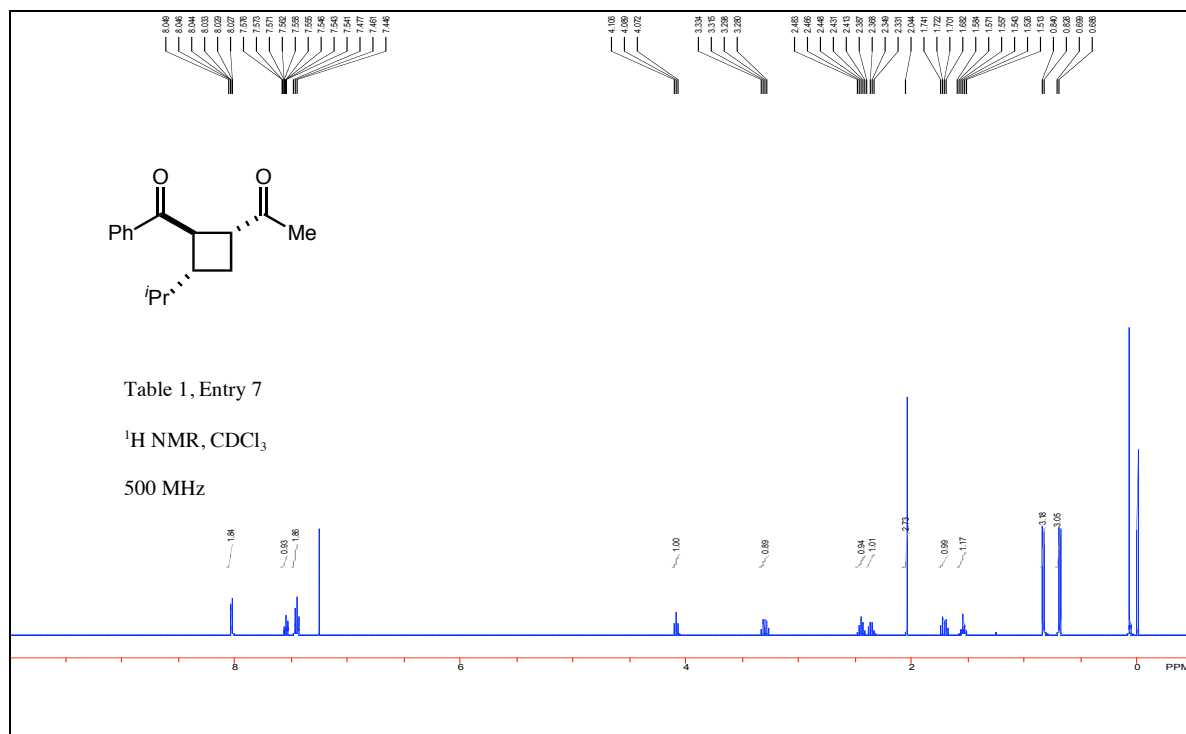

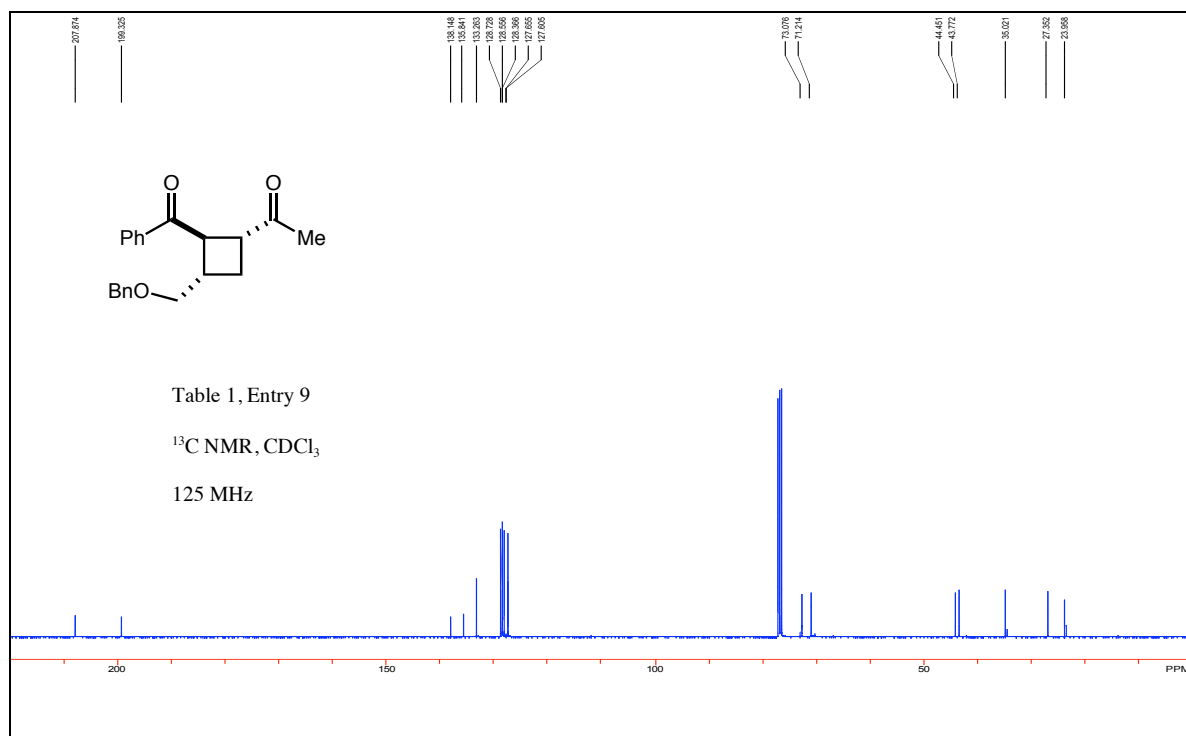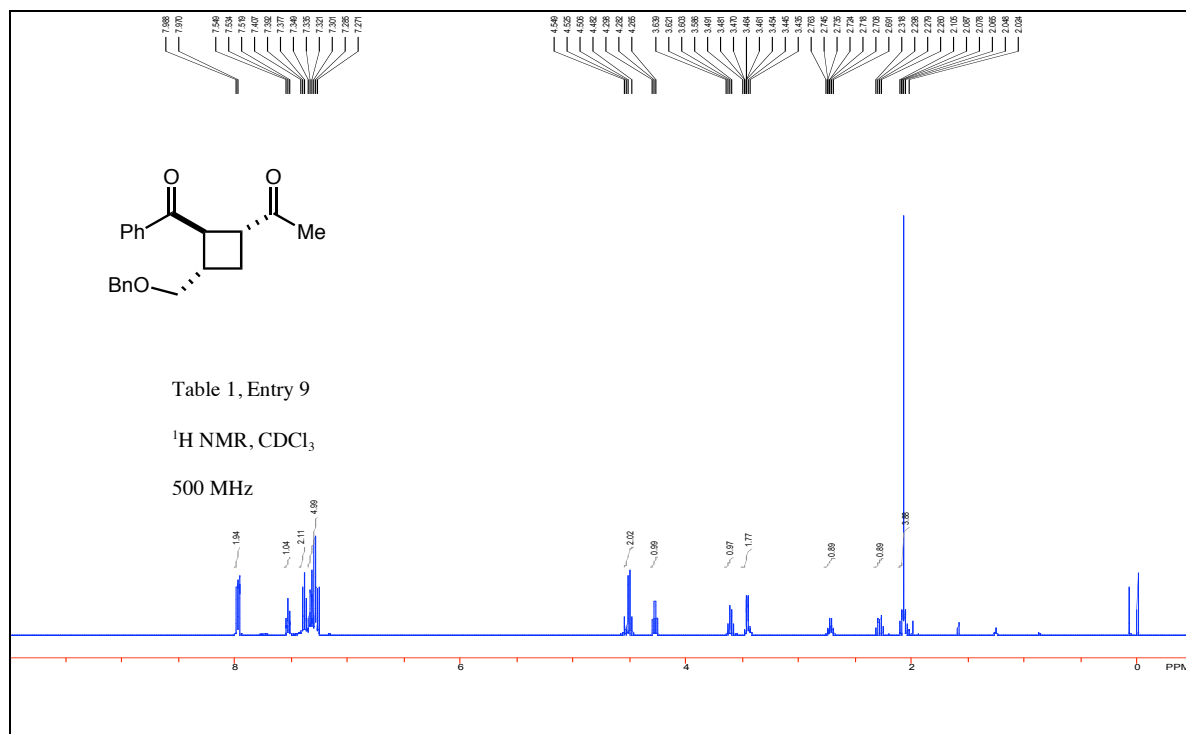

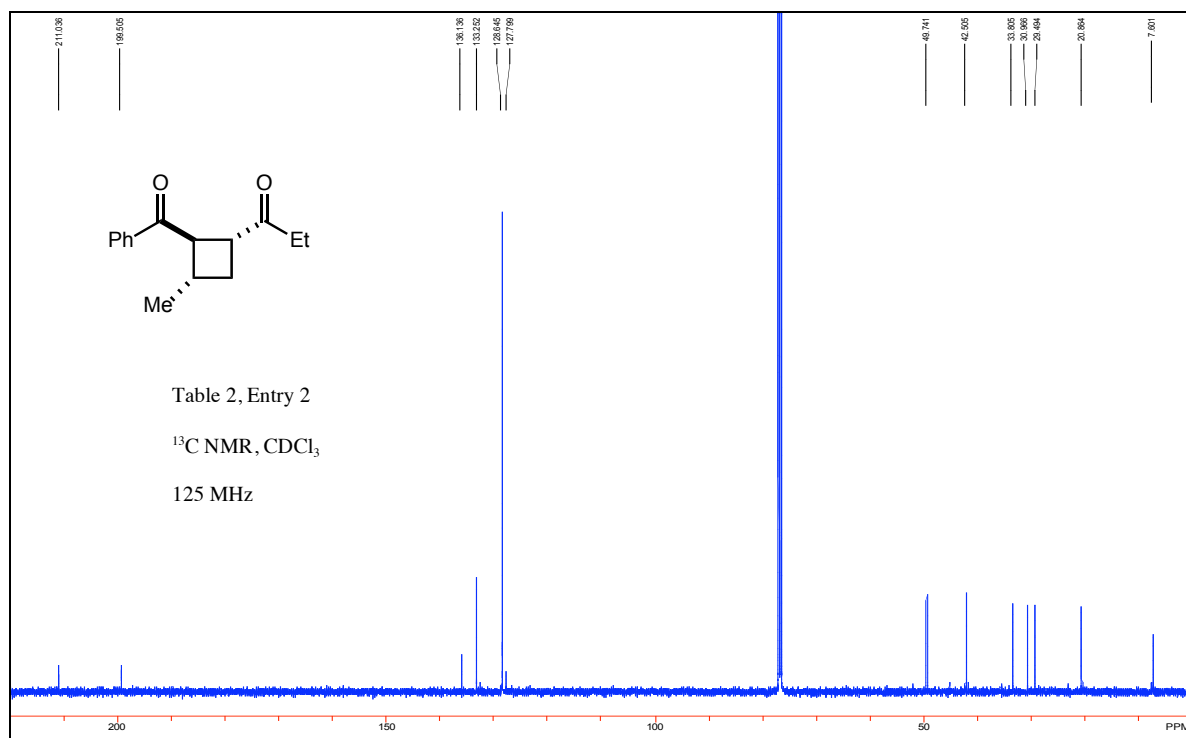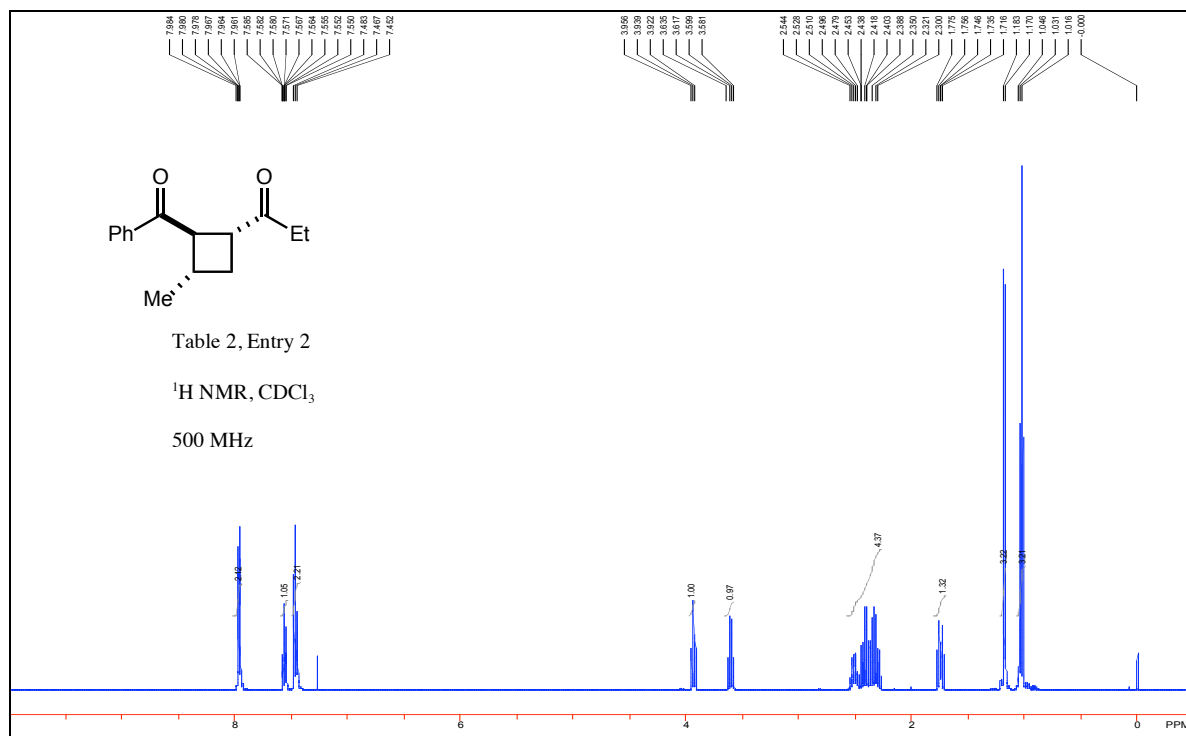

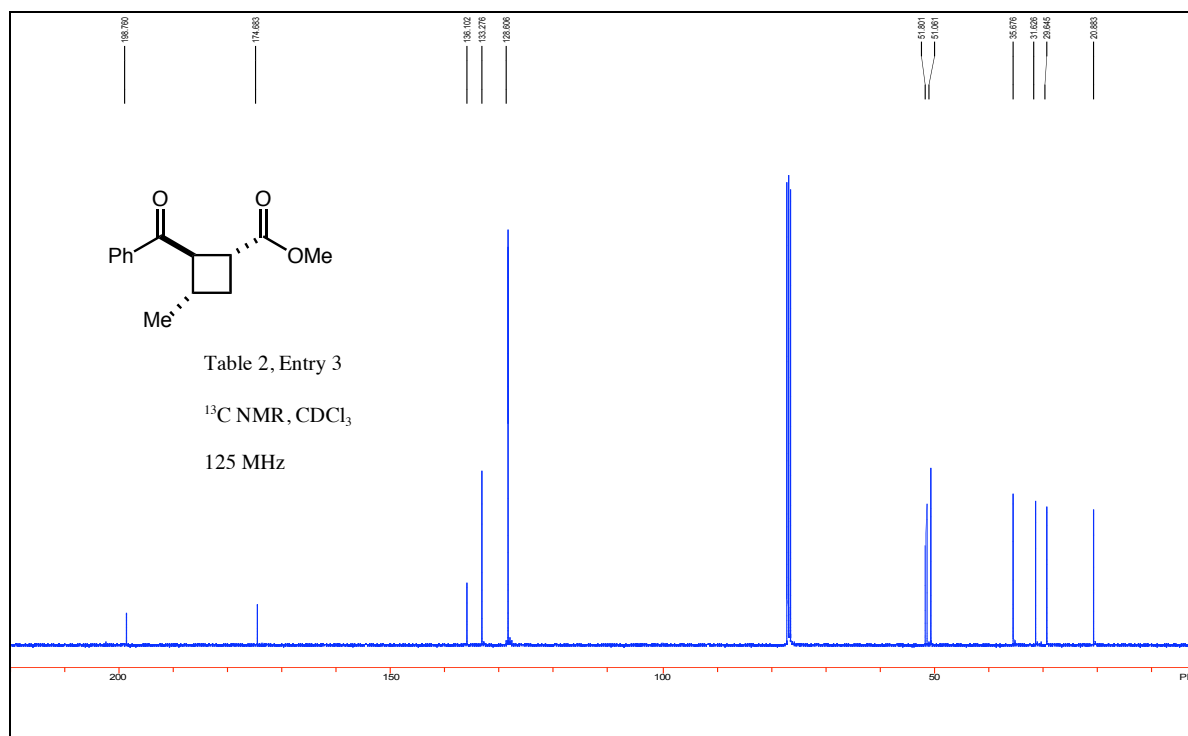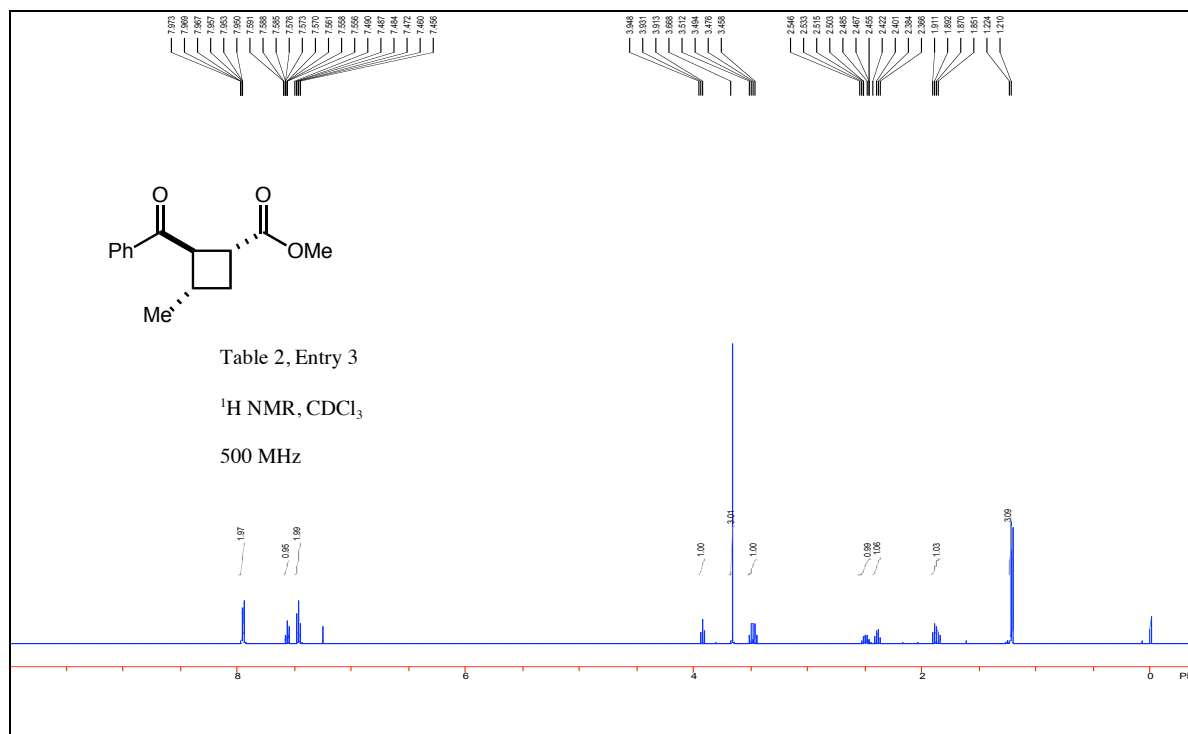

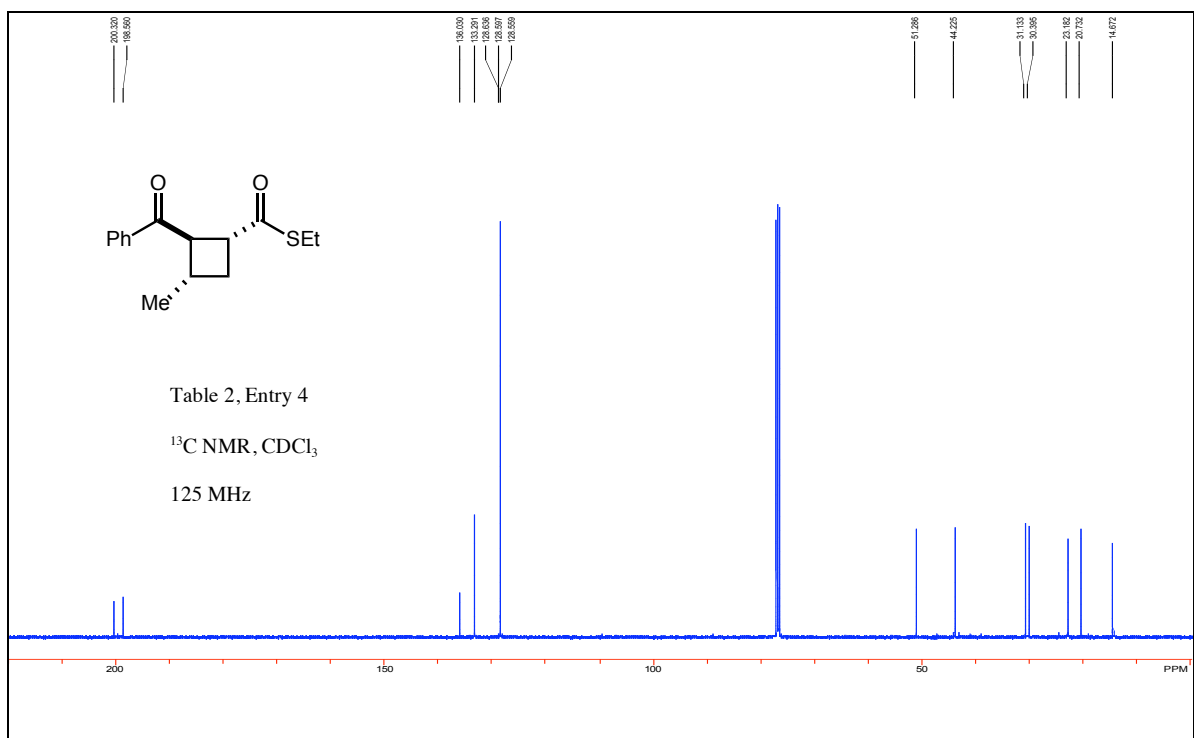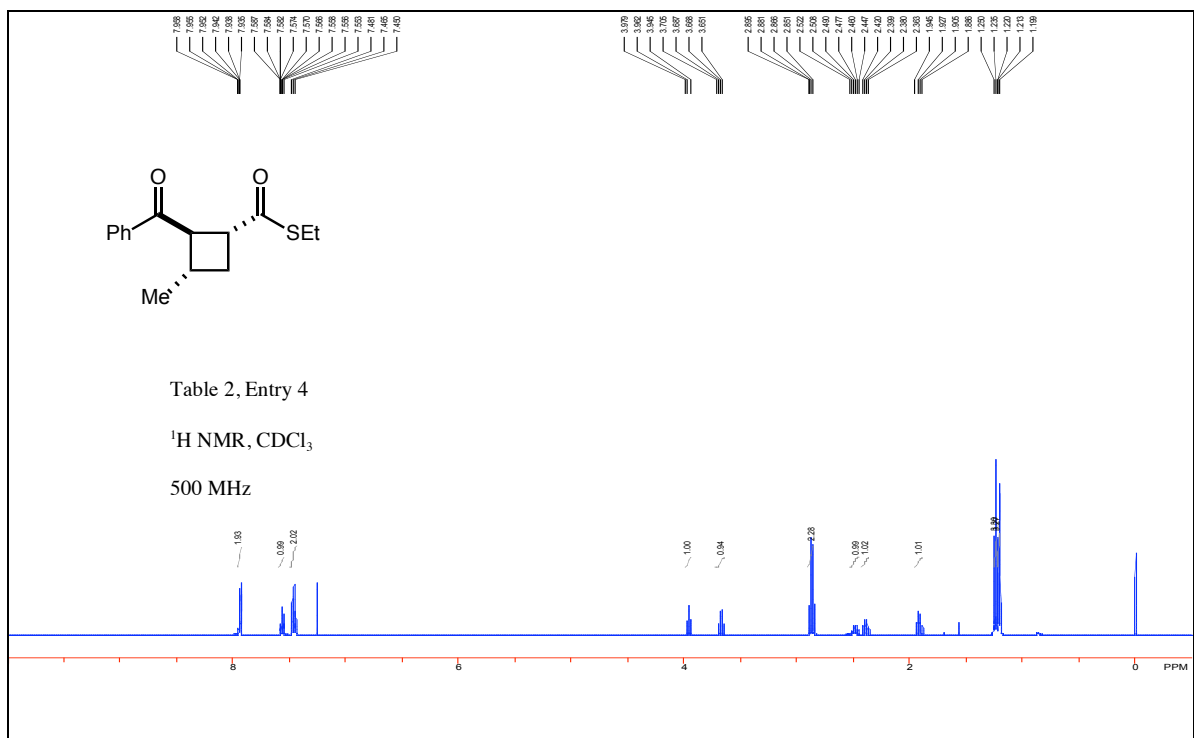



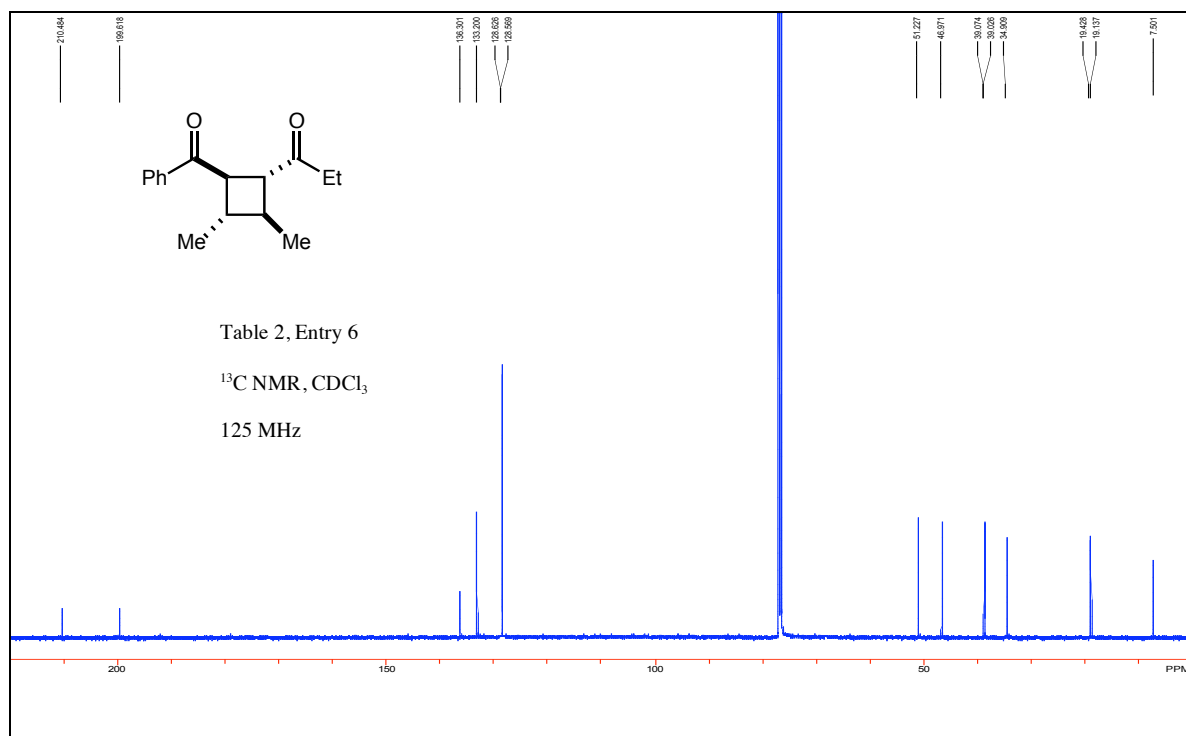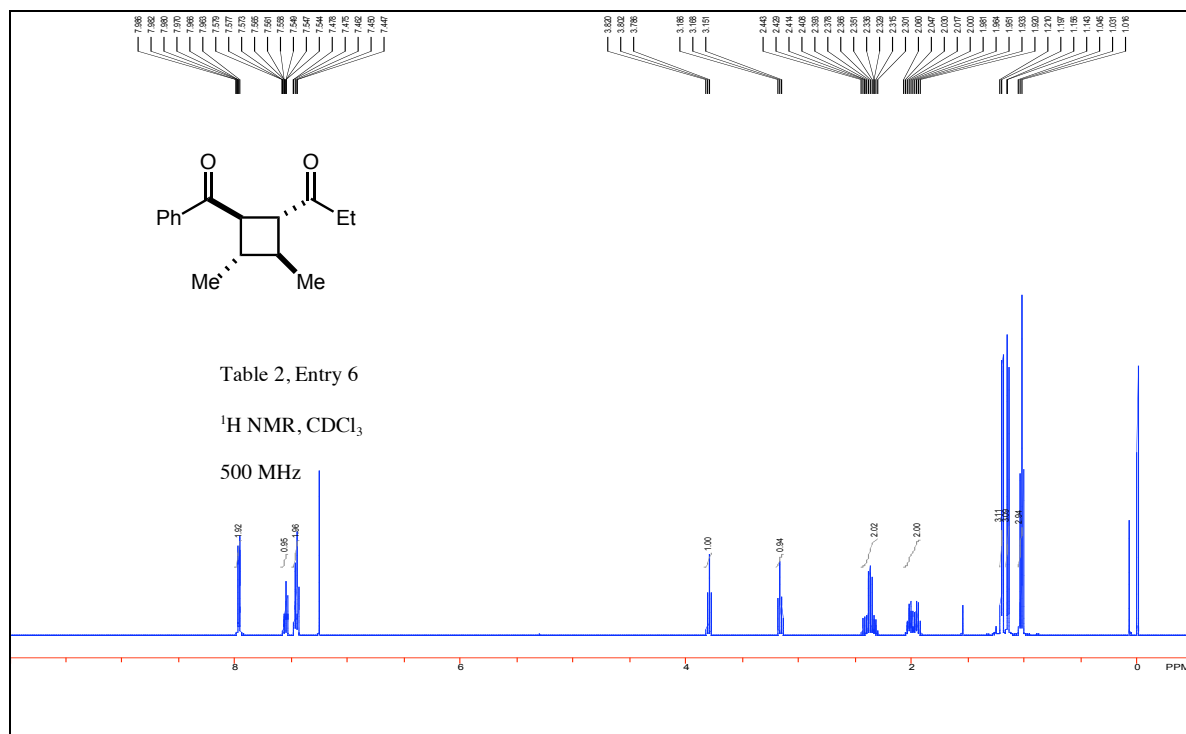

Supplement: NIHMS121383-supplement-2_si_002.pdf [file NIHMS121383-supplement-2_si_002.pdf]
